# Supplementary material for: Green organocatalytic α-hydroxylation of ketones
Source: Royal Society of Chemistry journal article supplement (doi:10.1039/c6ob00036c), 2016-01-01

## **Green Organocatalytic $\alpha$ -Hydroxylation of Ketones**

**Errika Voutyritsa, Alexis Theodorou and Christoforos G. Kokotos\***

*Laboratory of Organic Chemistry, Department of Chemistry, National and  
Kapodestrian University of Athens,  
Panepistimiopolis, Athens 15771, Greece*

## **SUPPORTING INFORMATION**

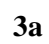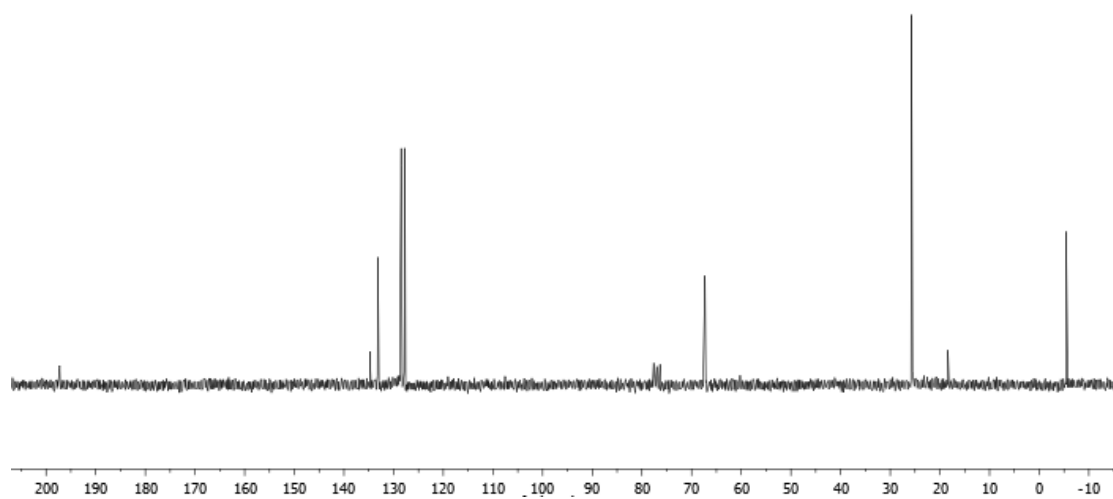

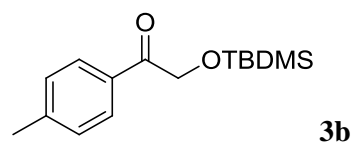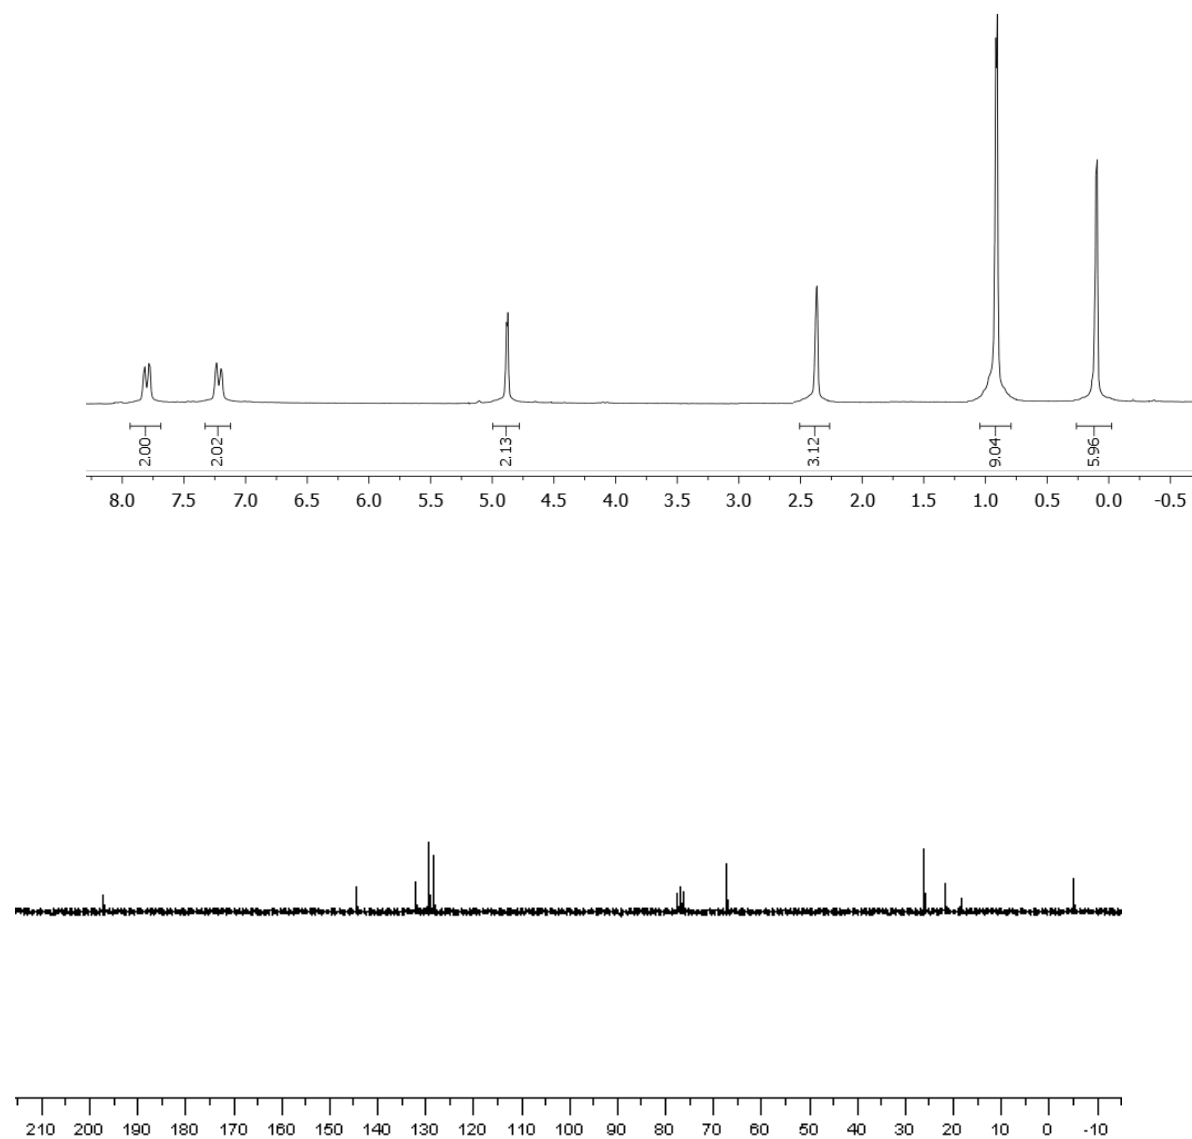

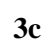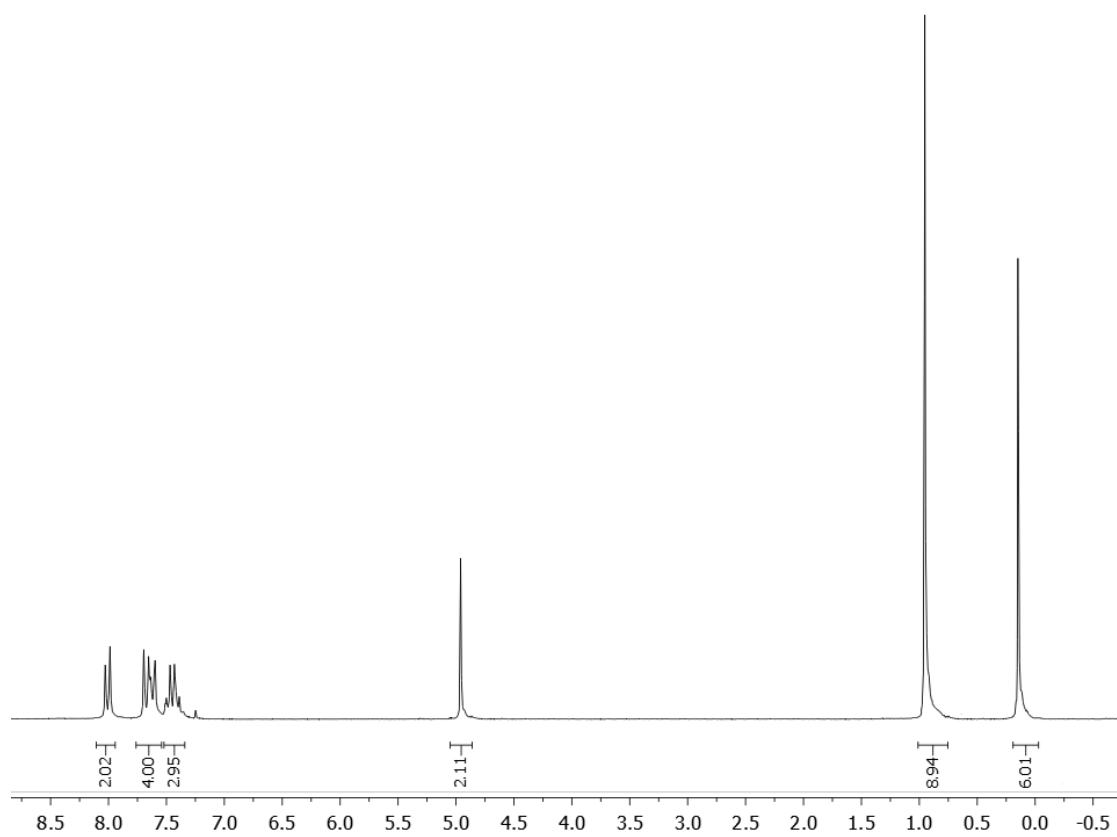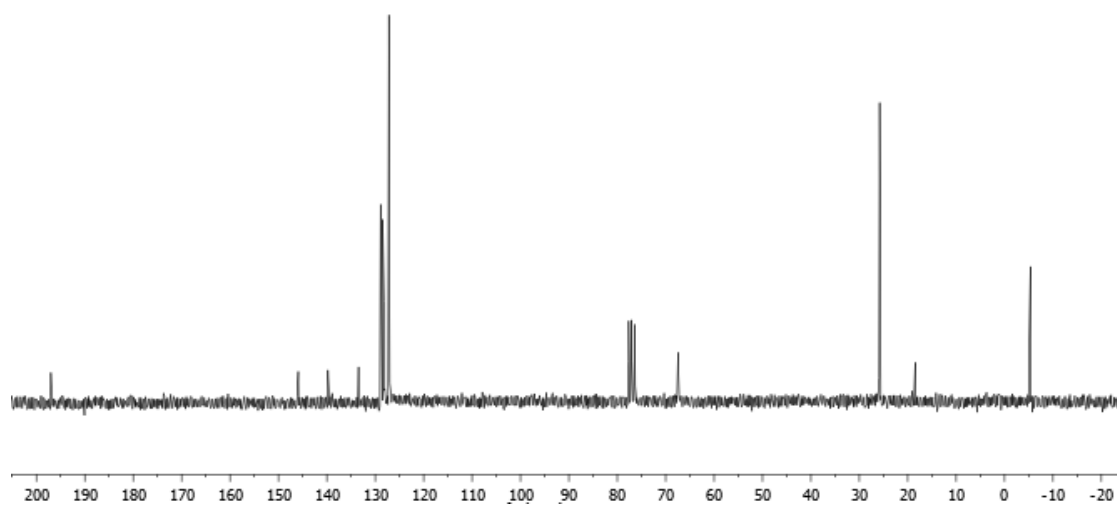

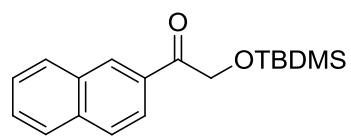

**3d**

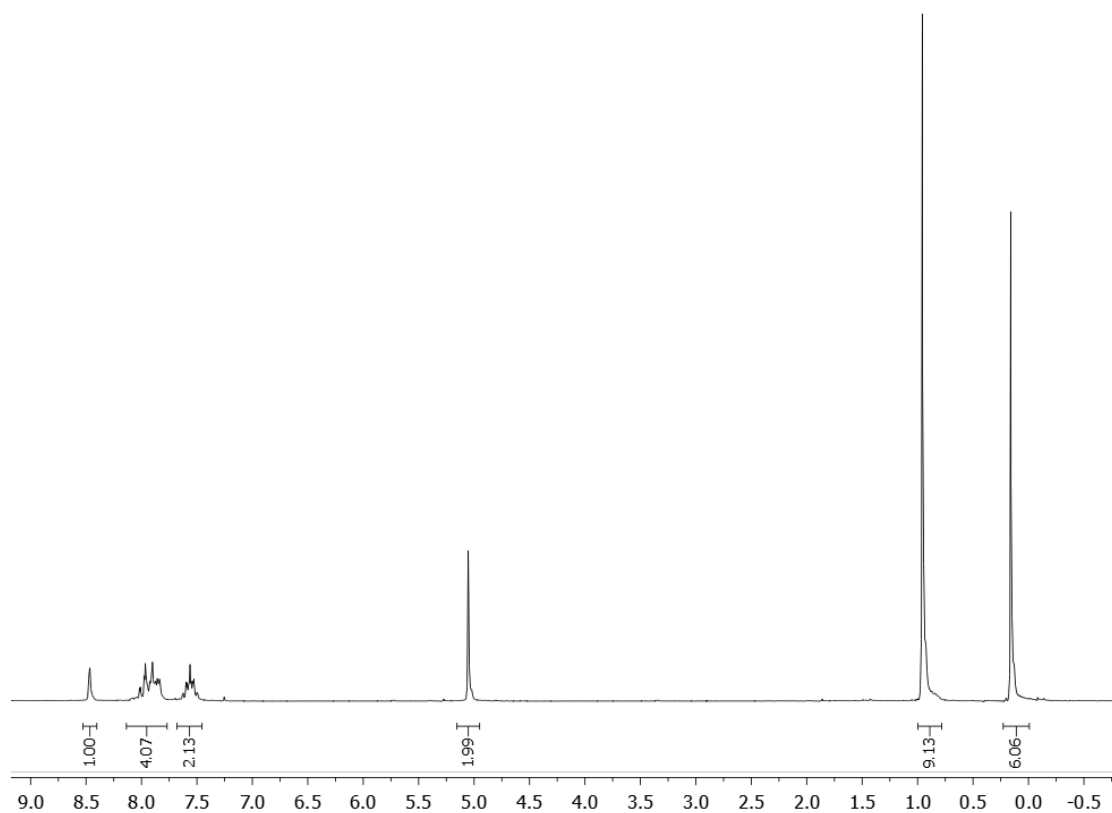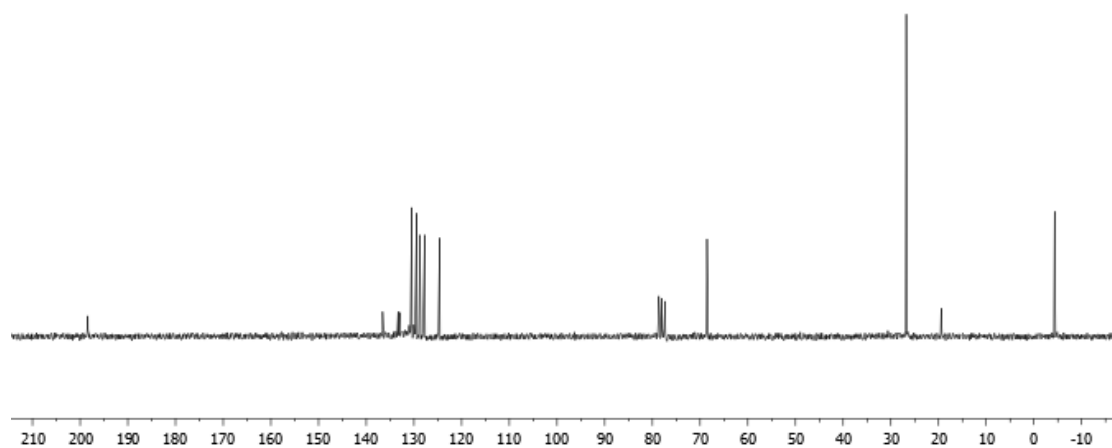

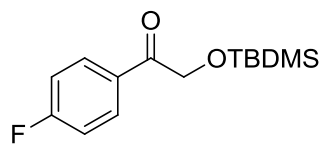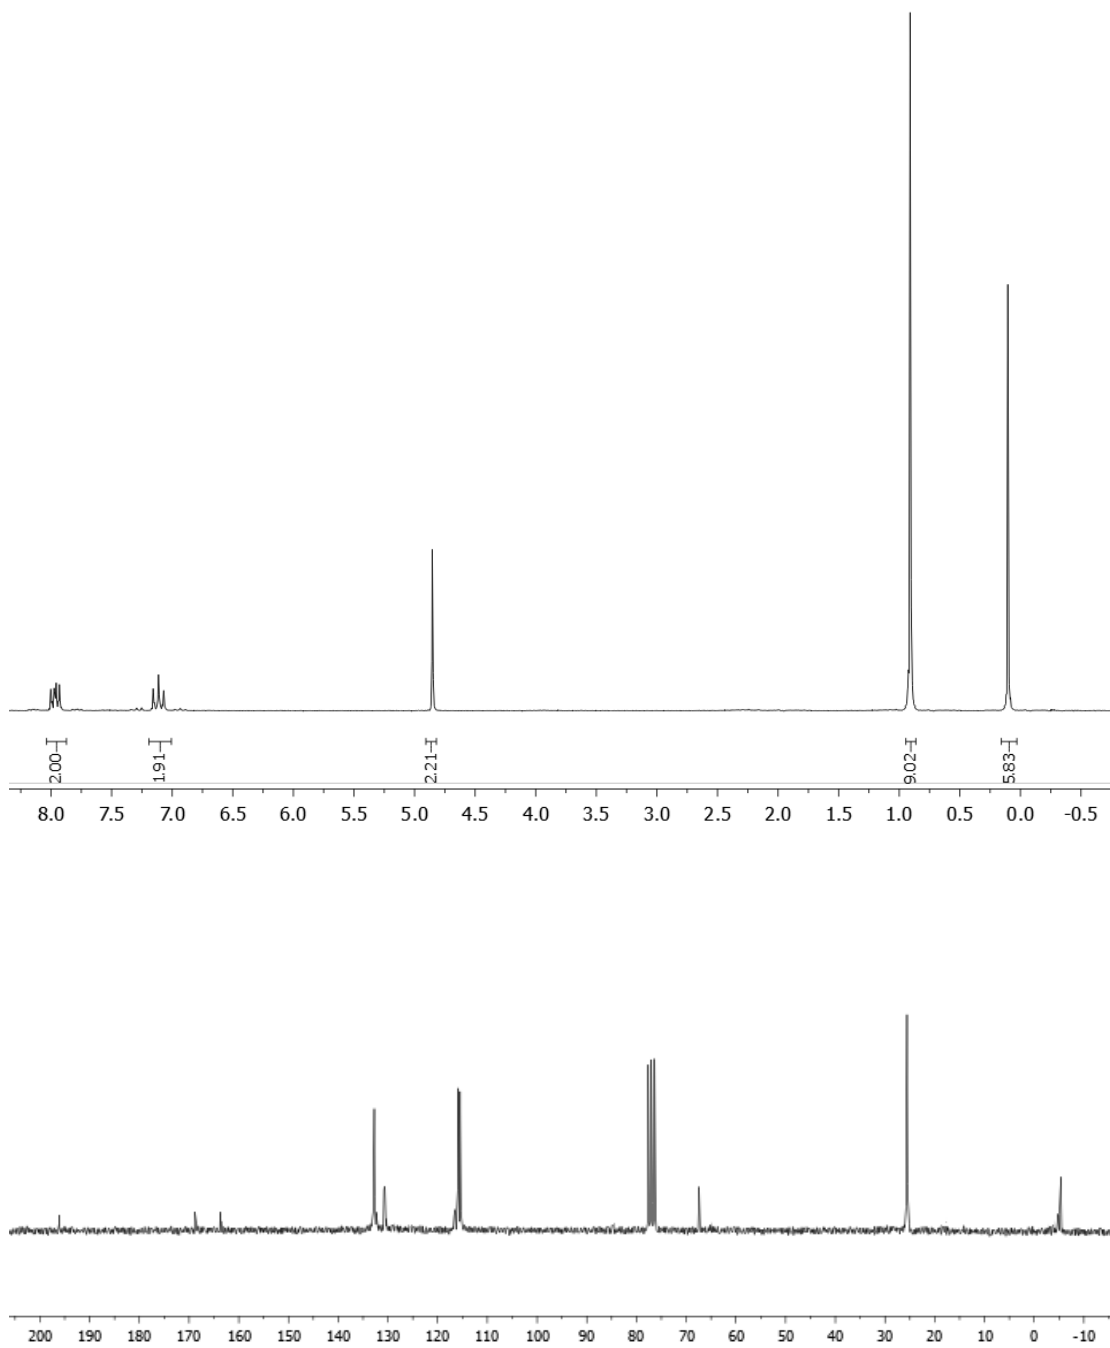

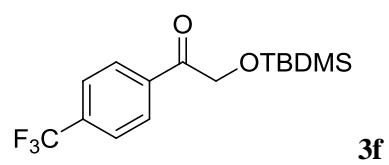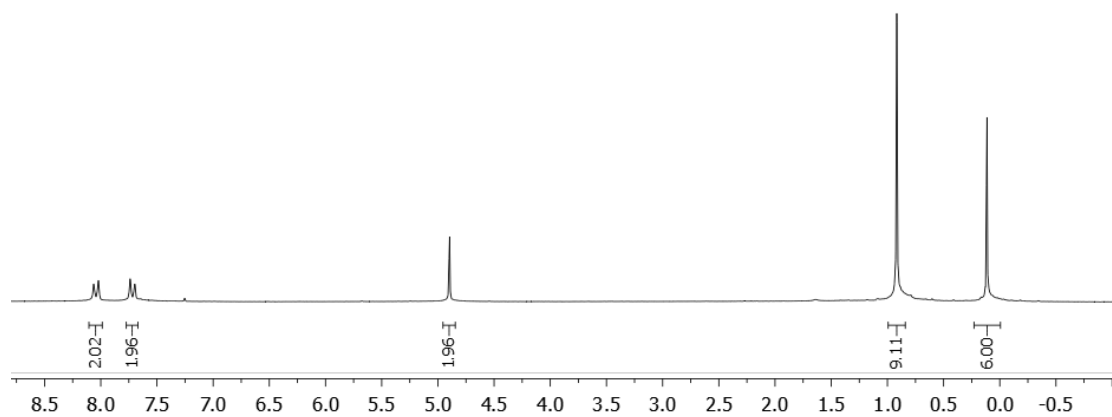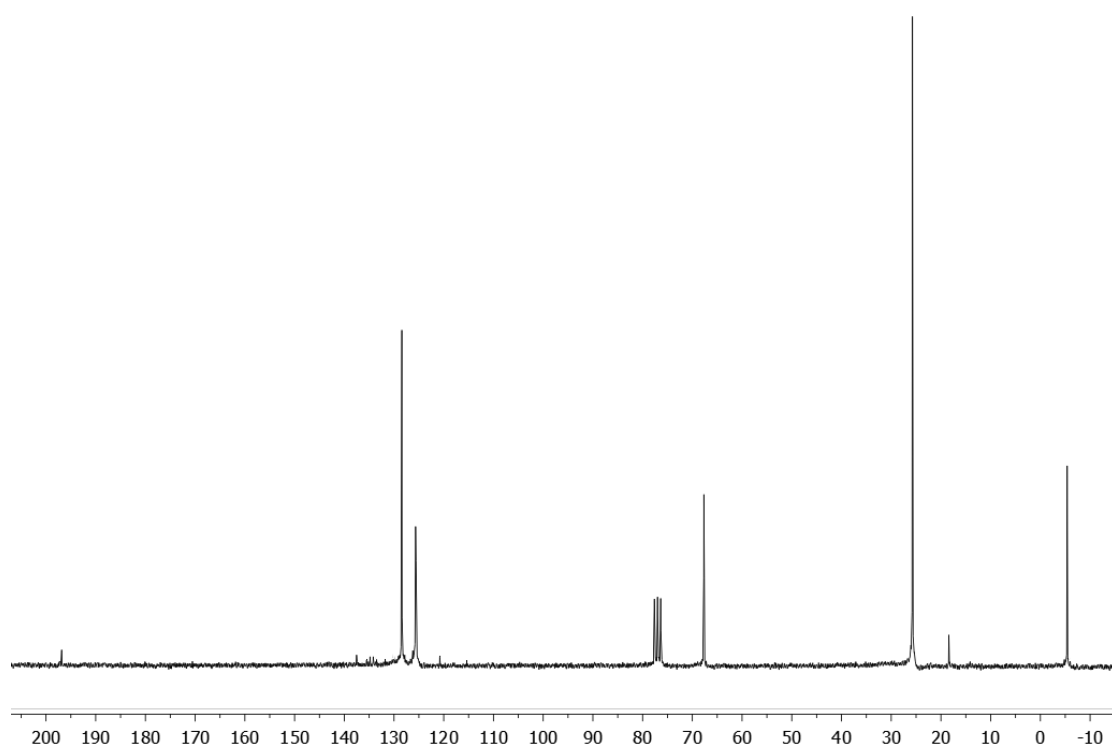

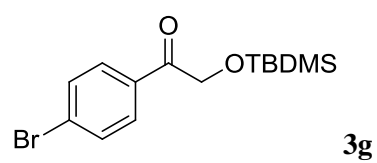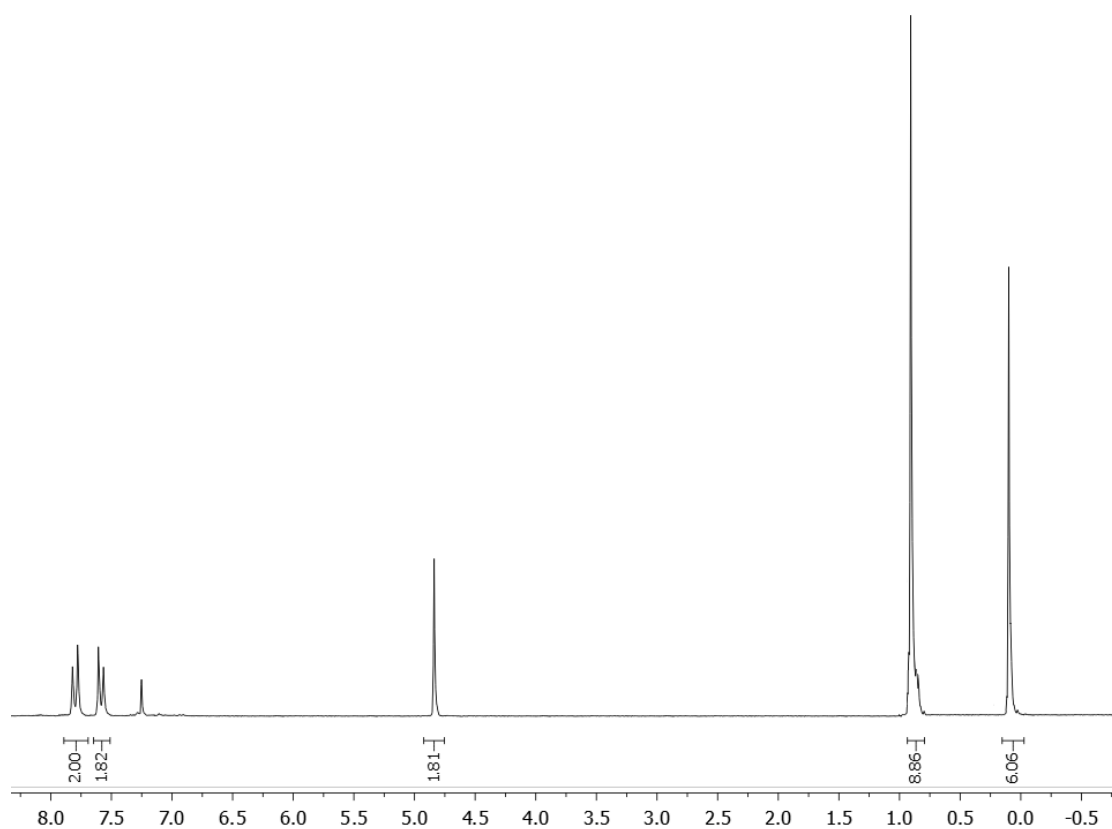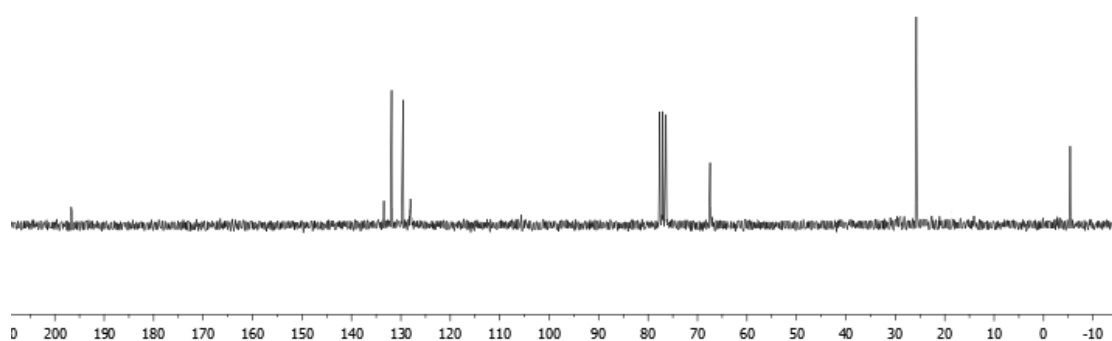



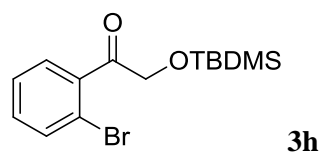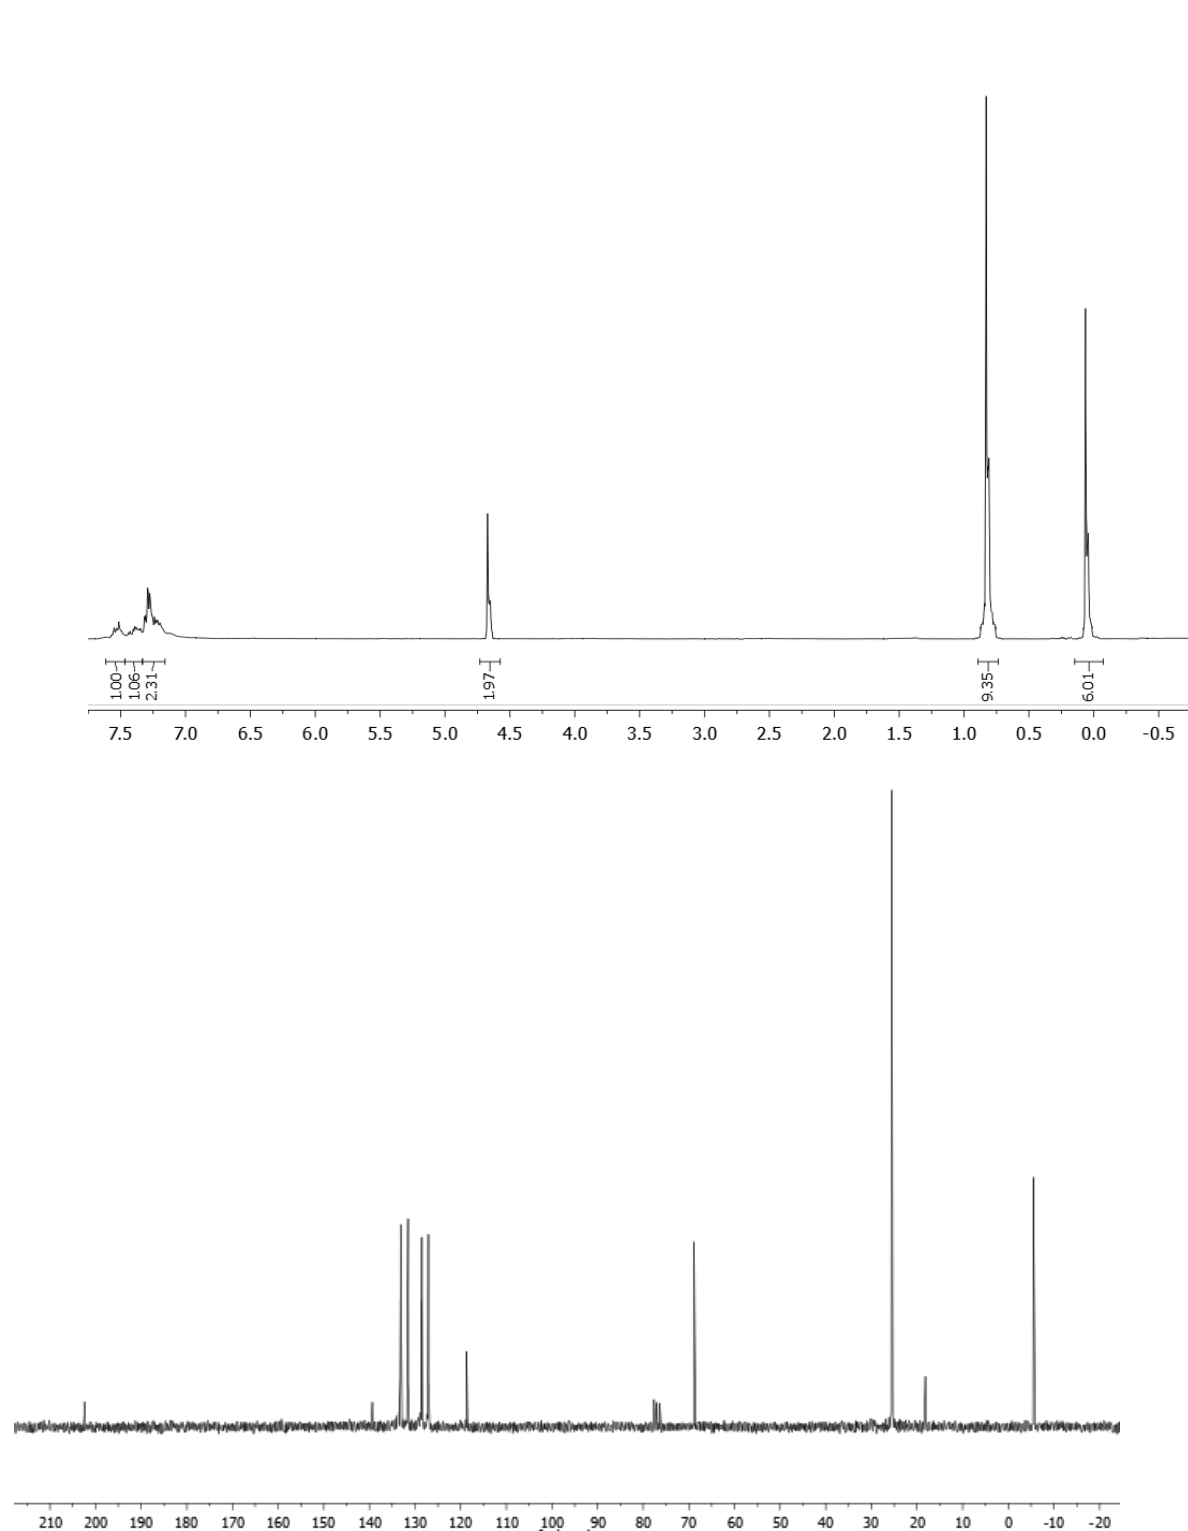

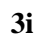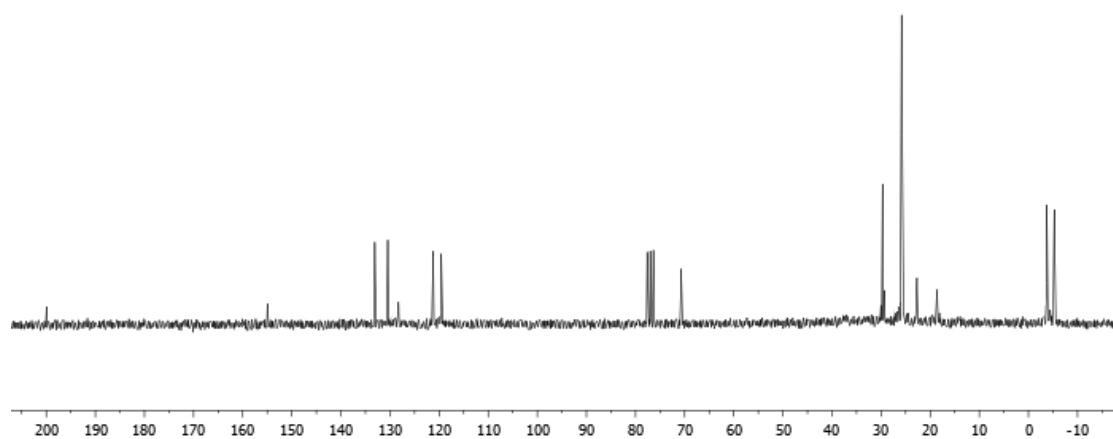

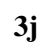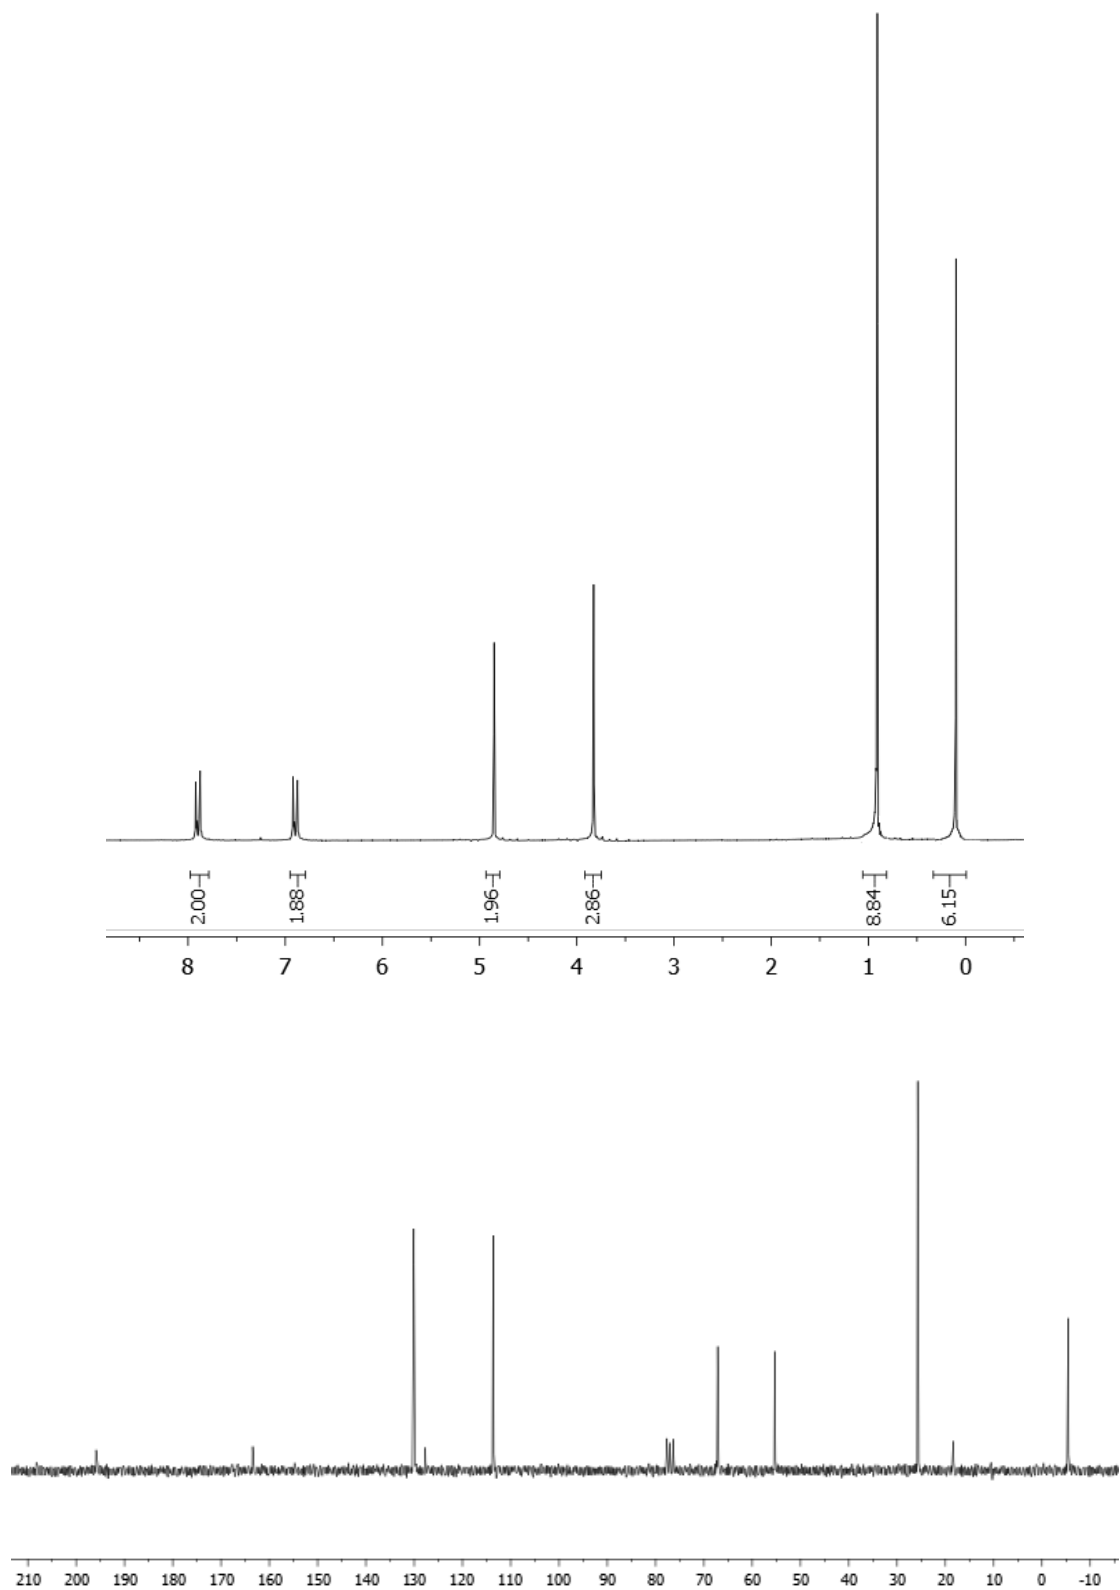

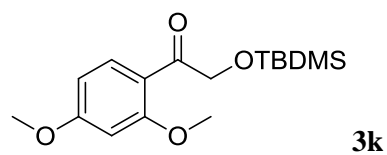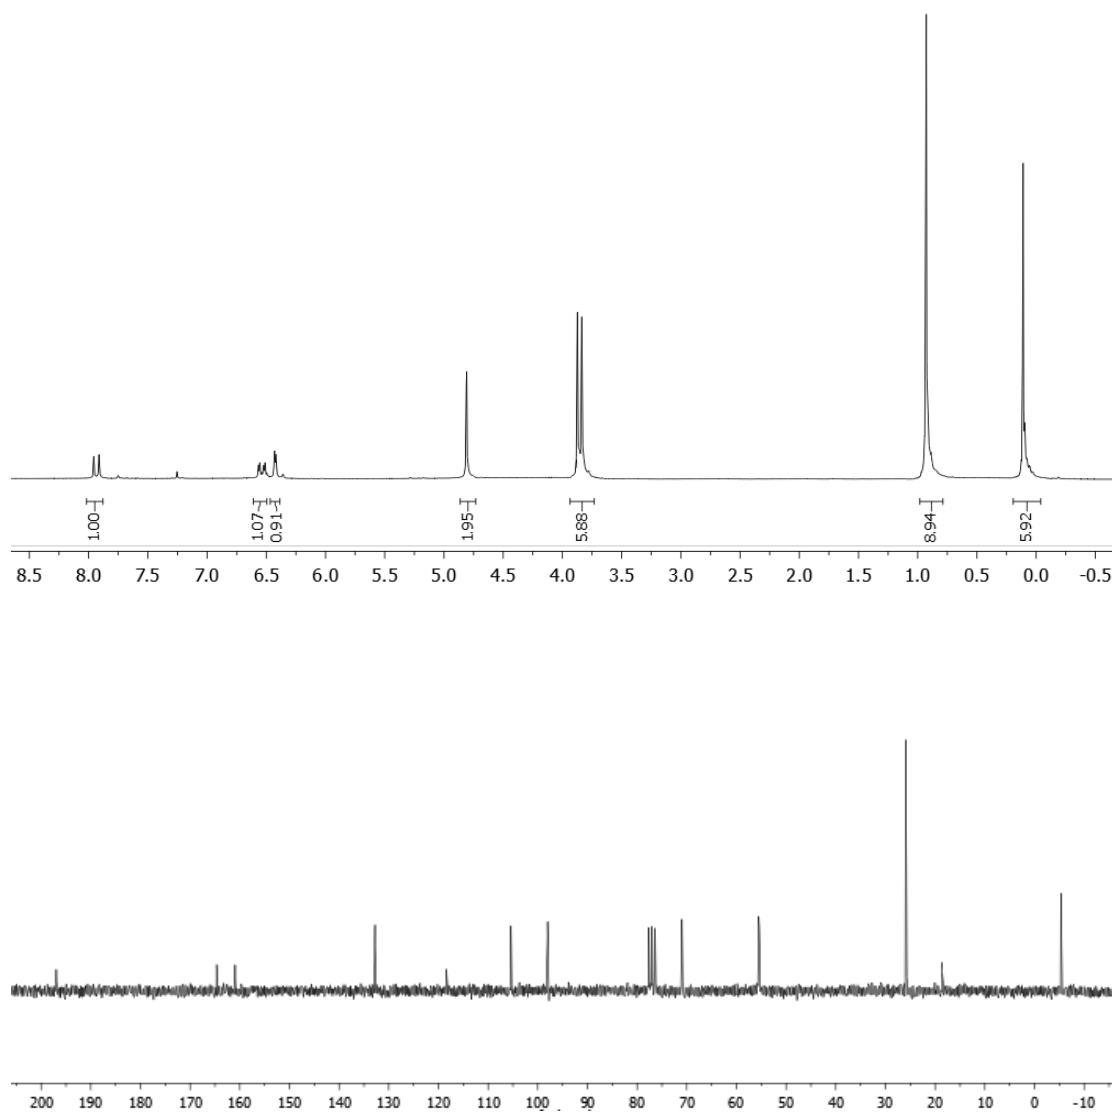

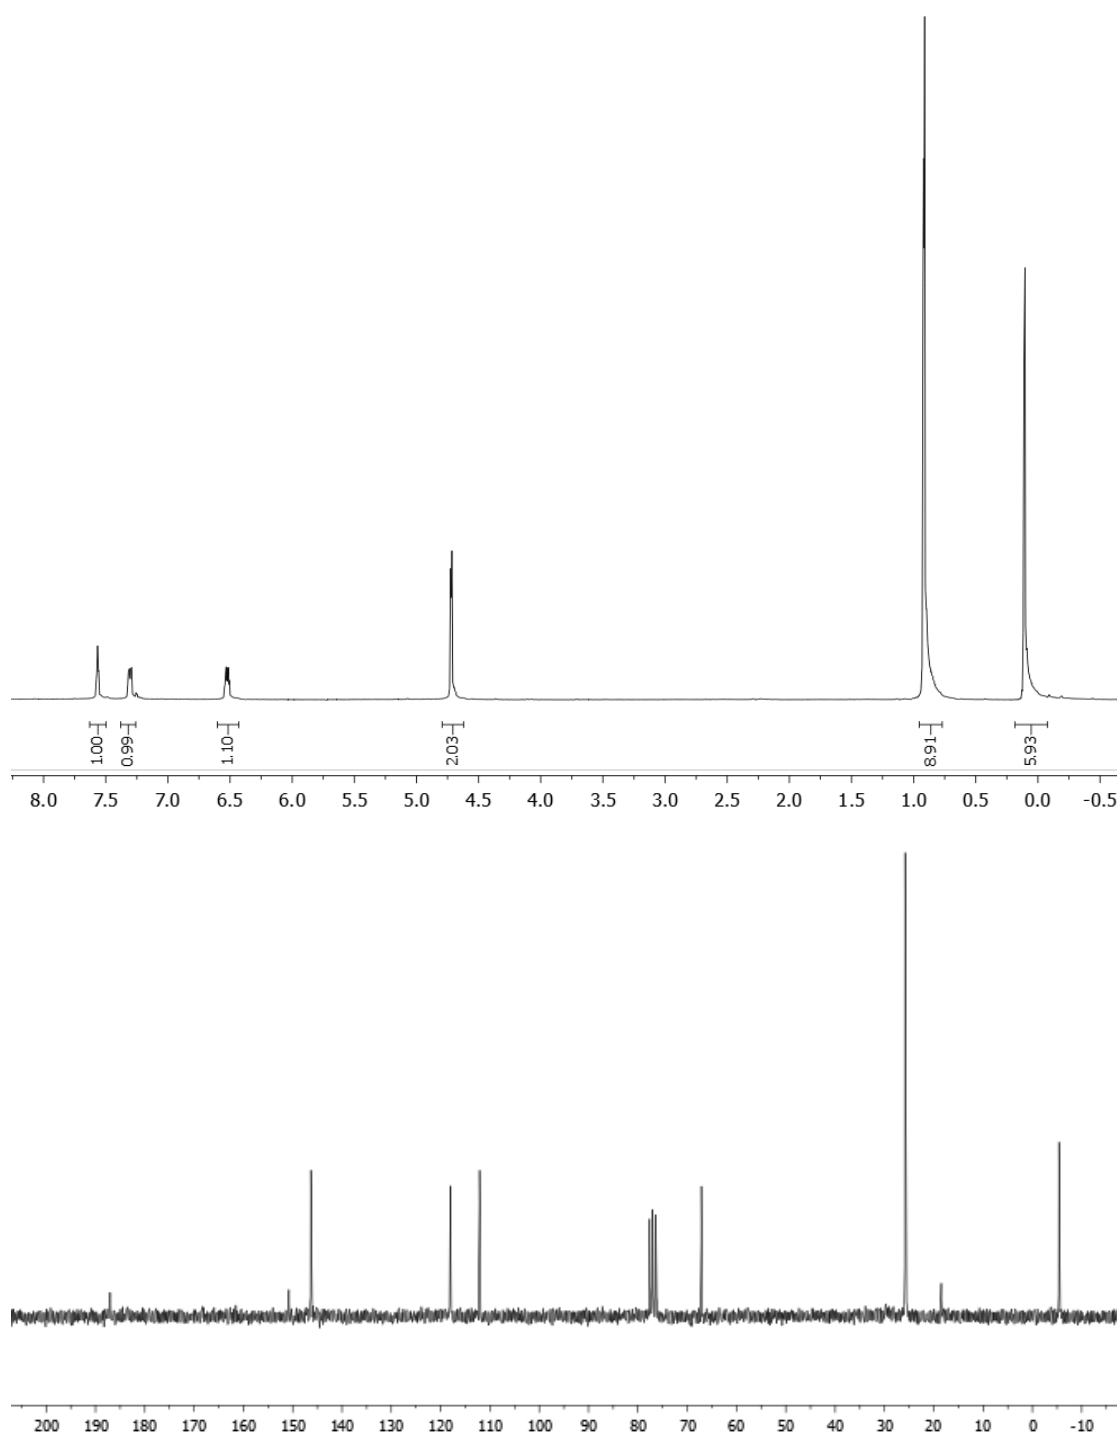

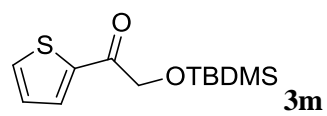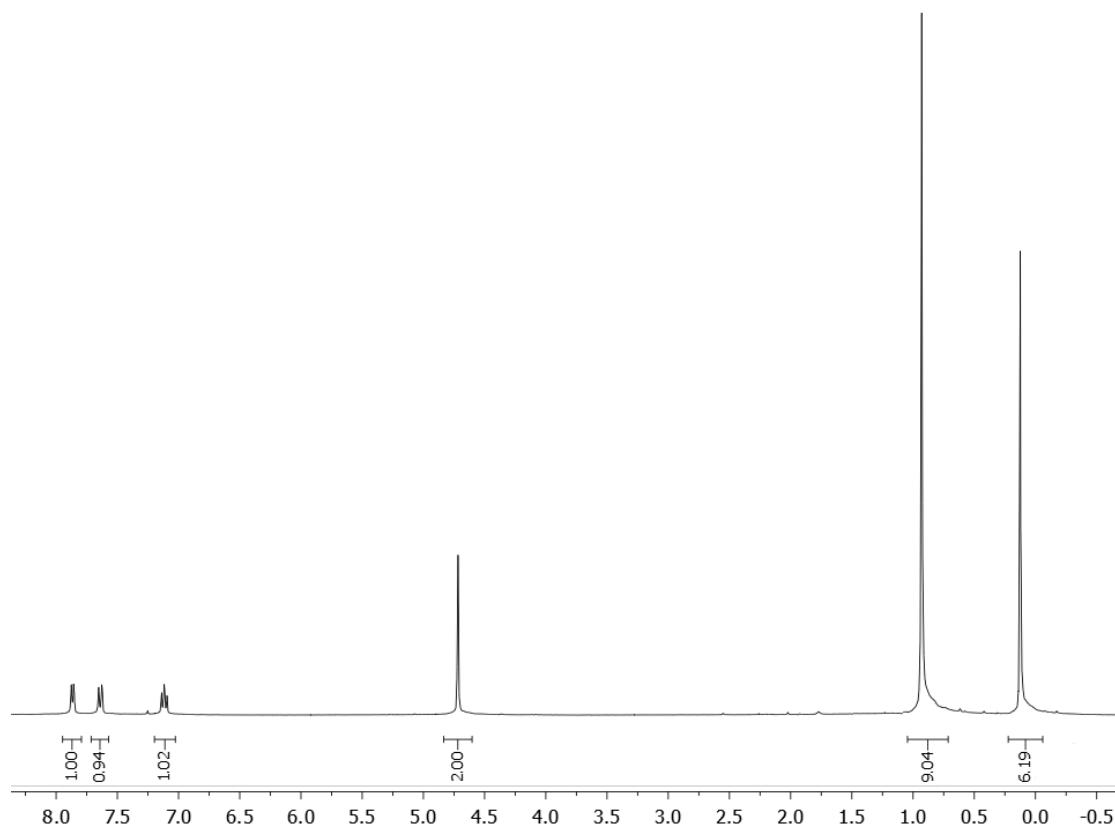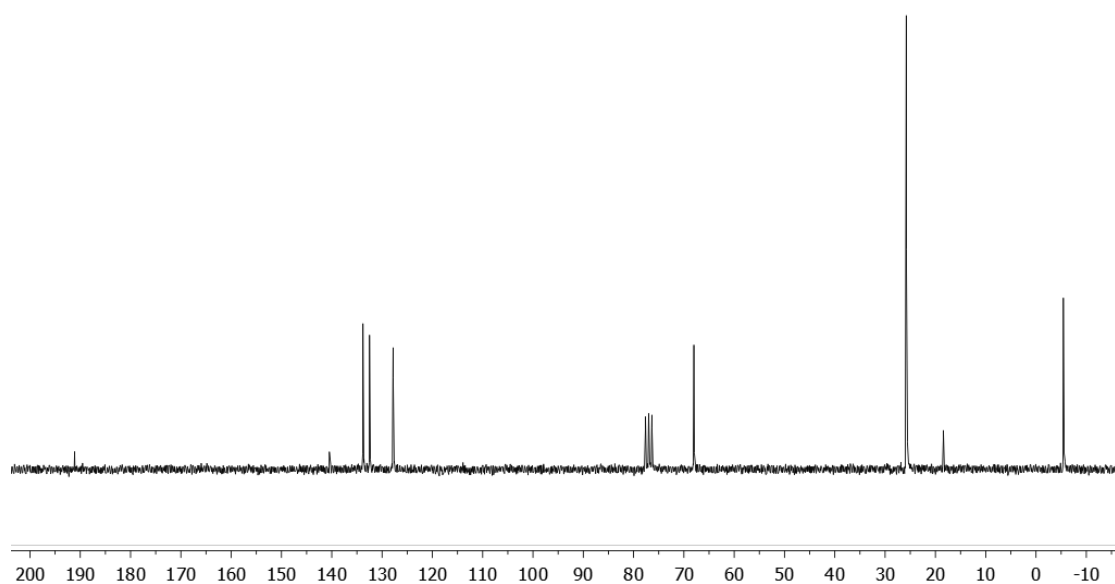

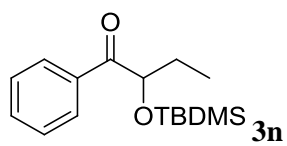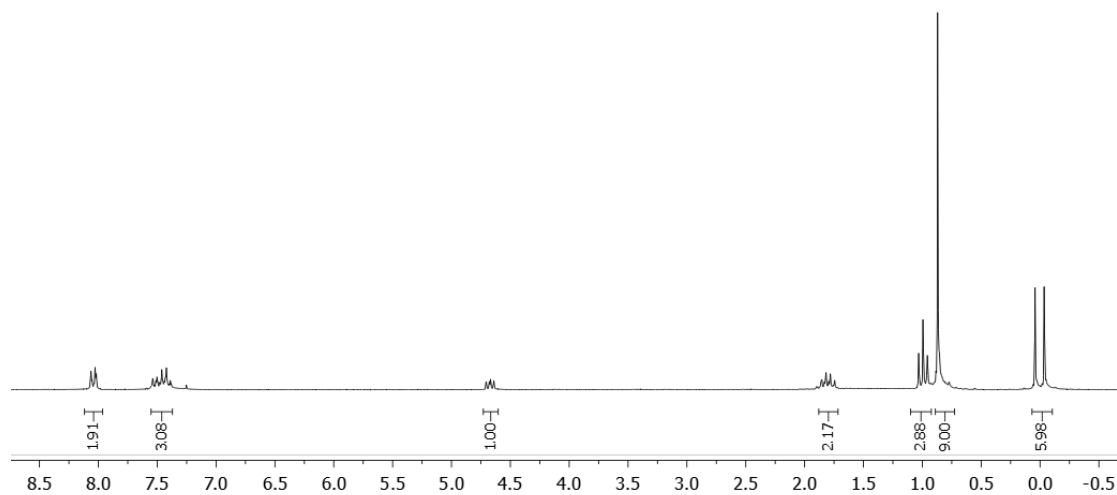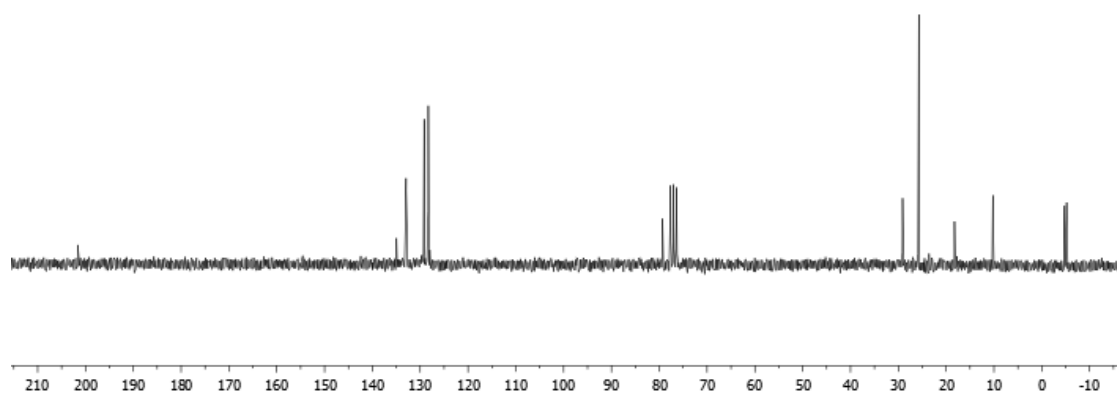

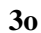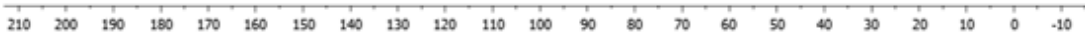



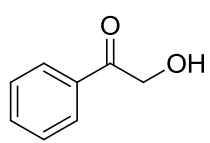

**4a**

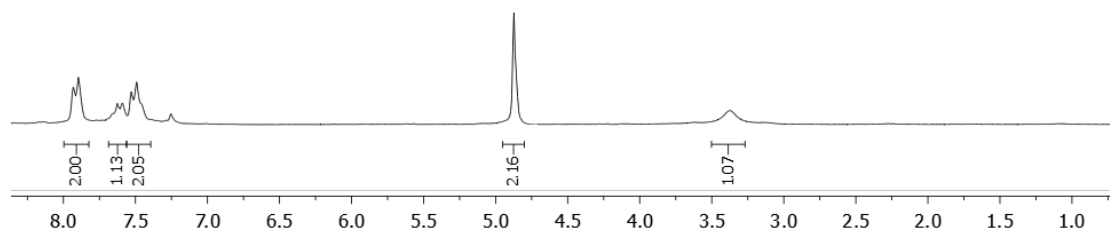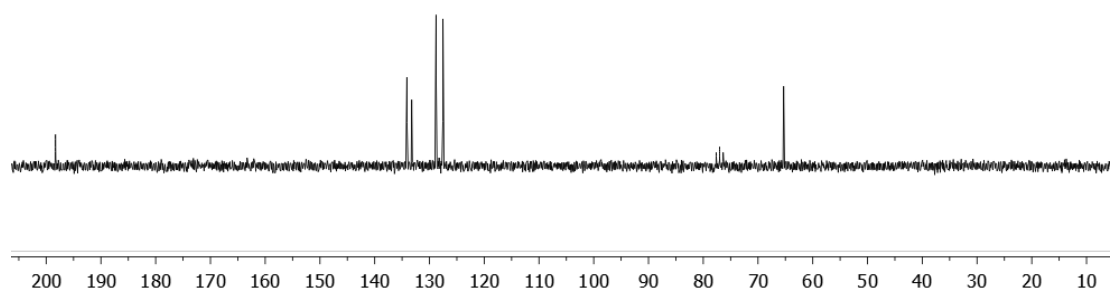

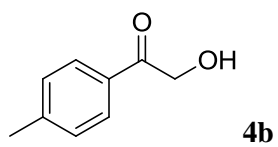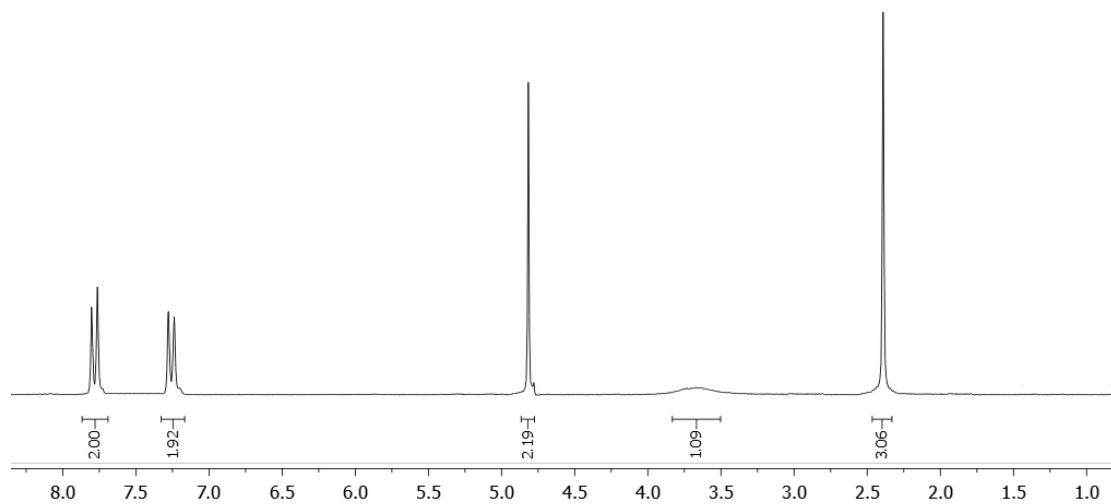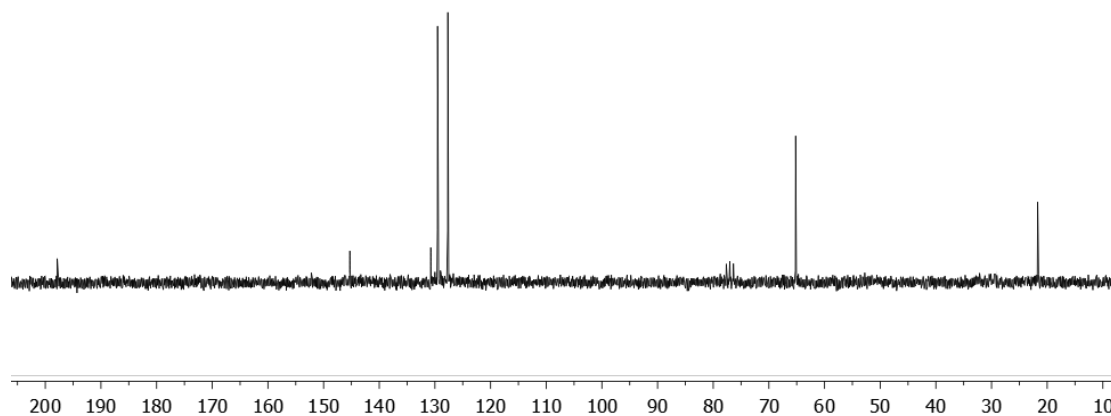

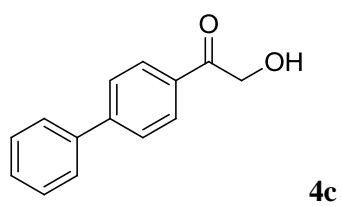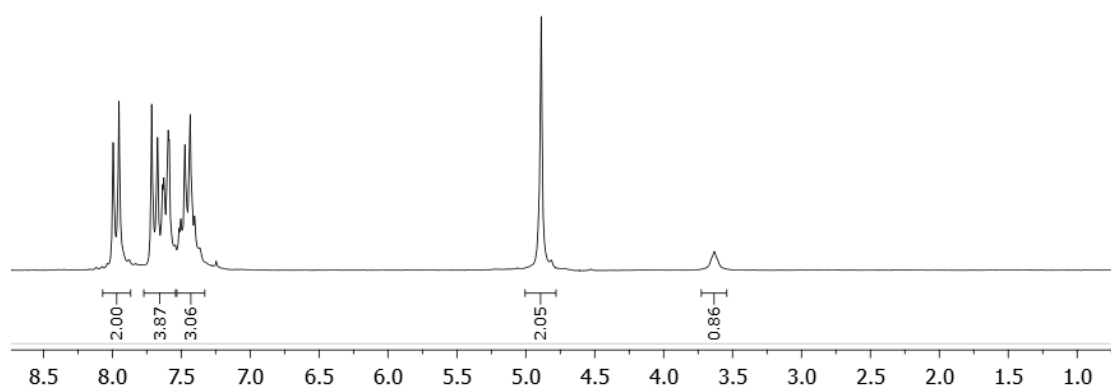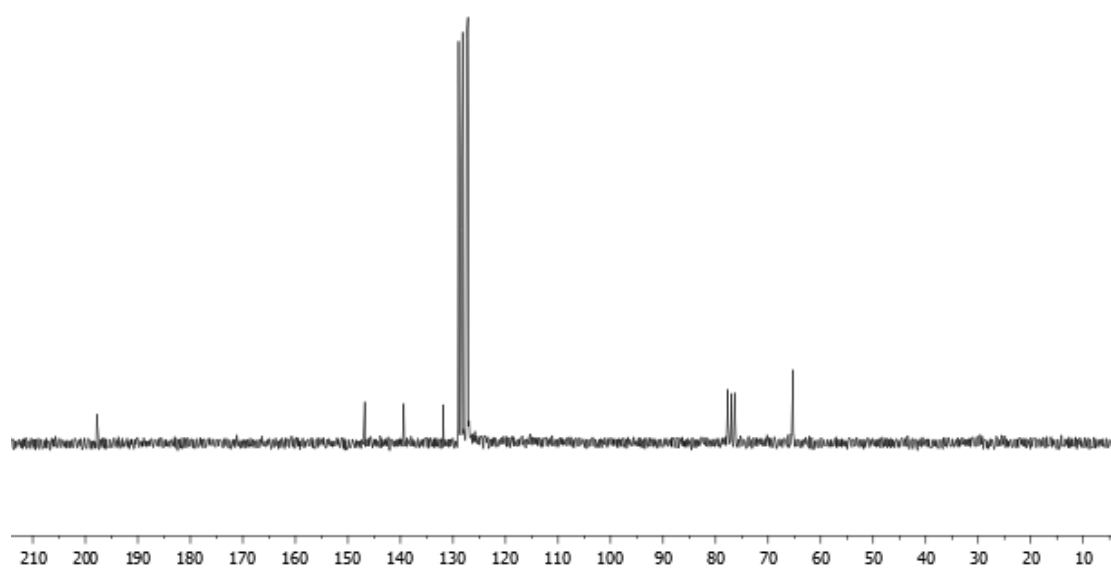

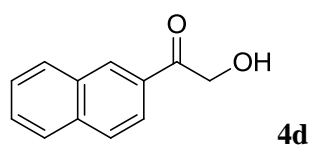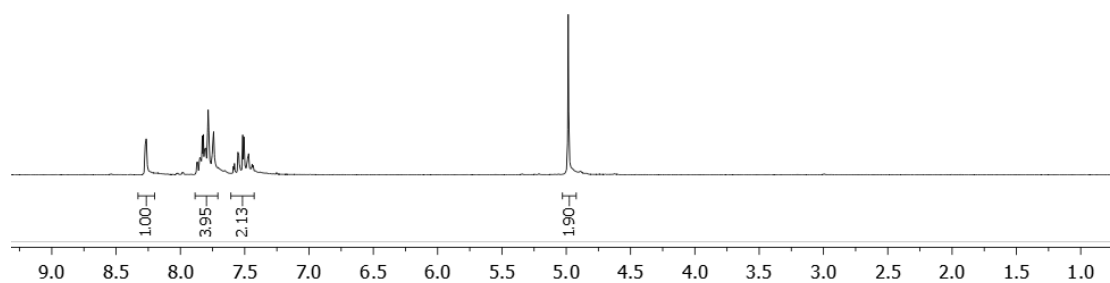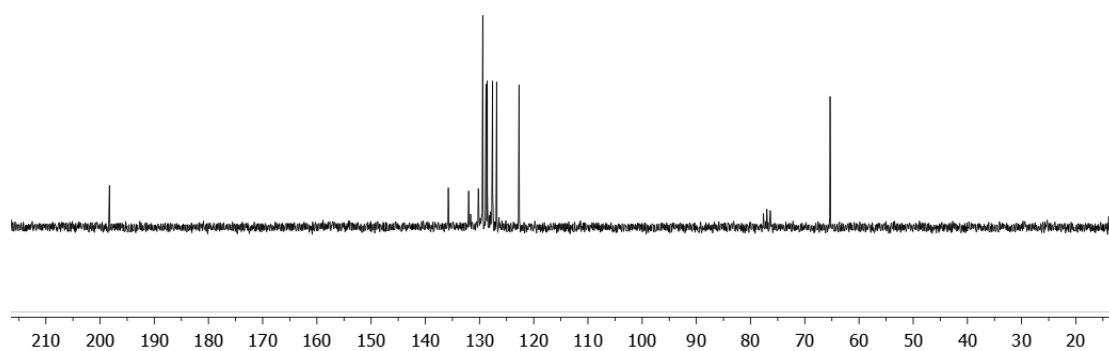

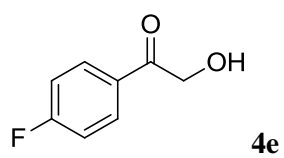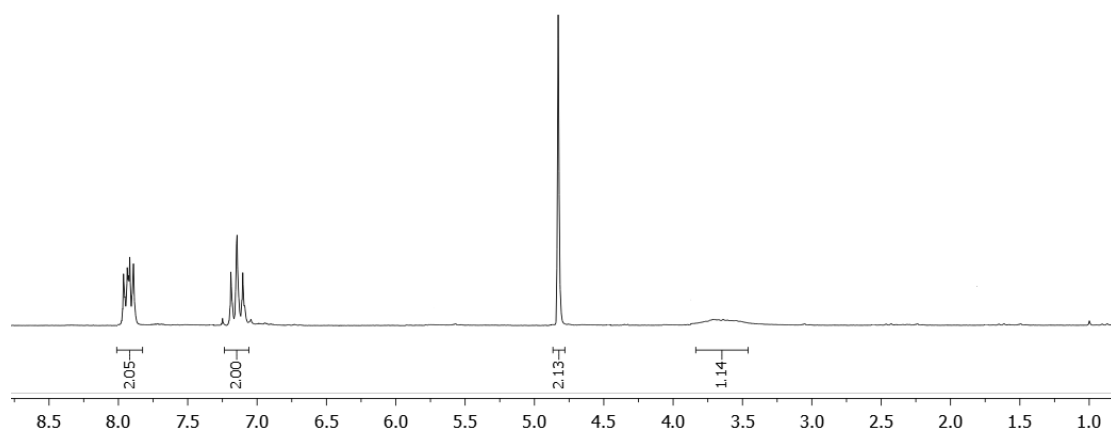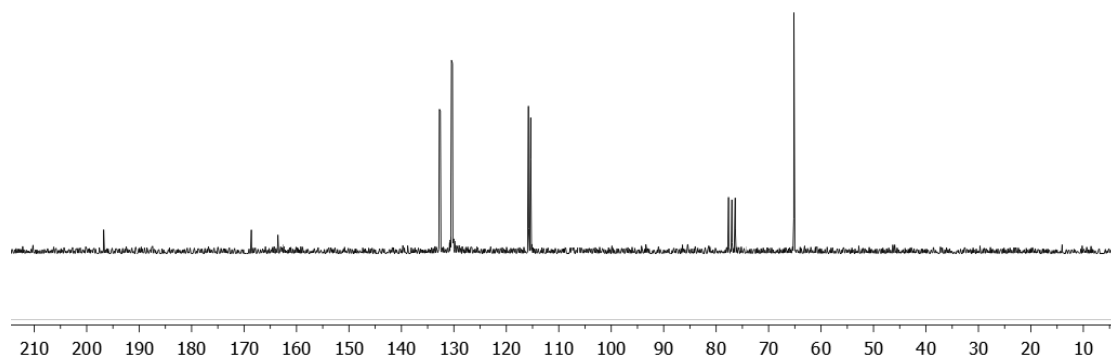

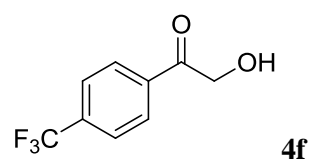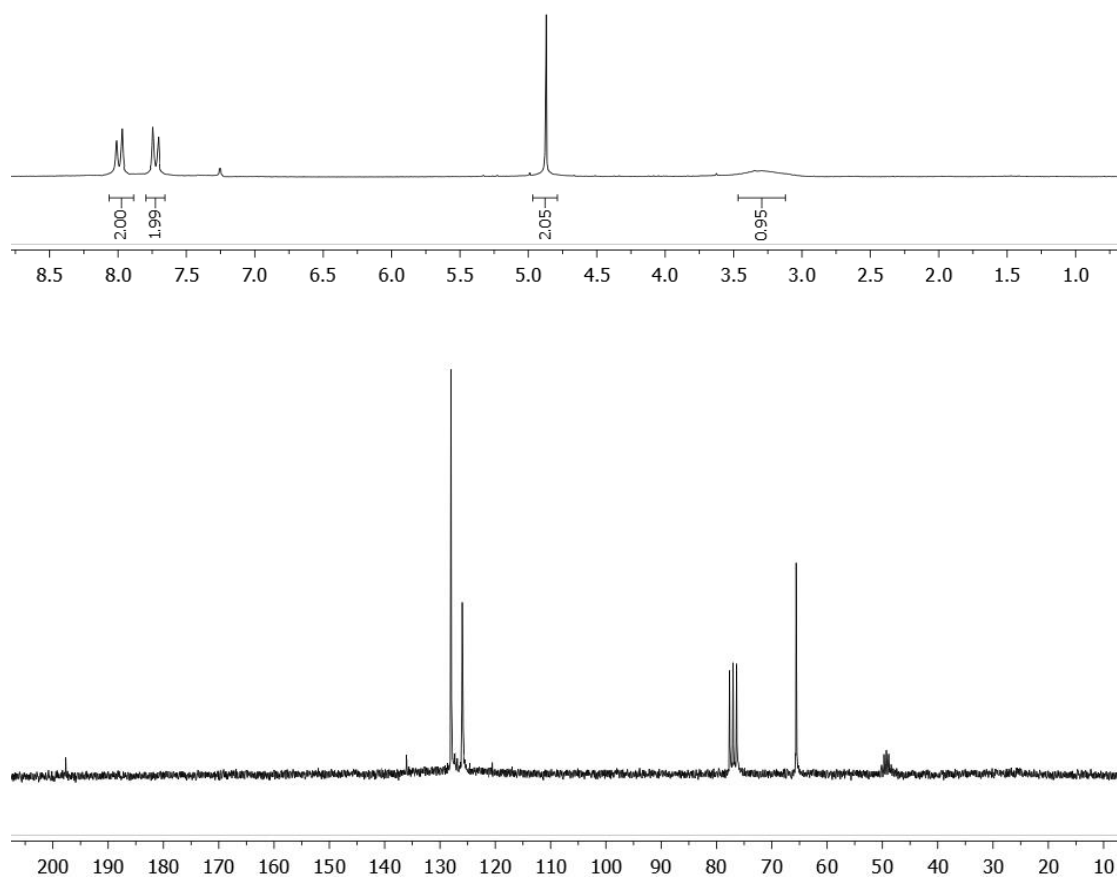

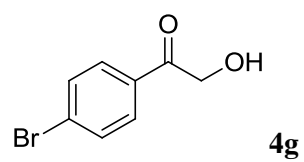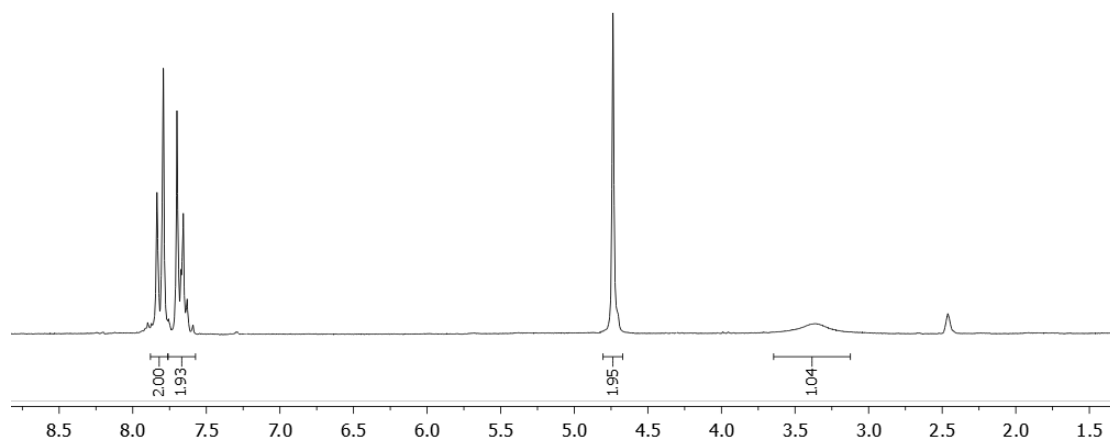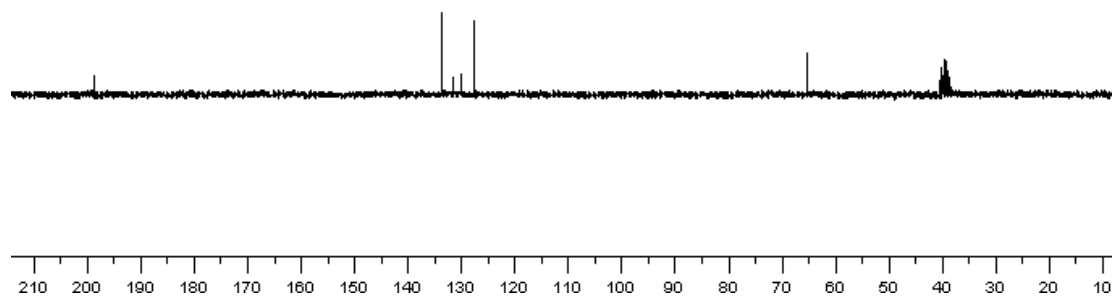

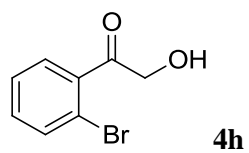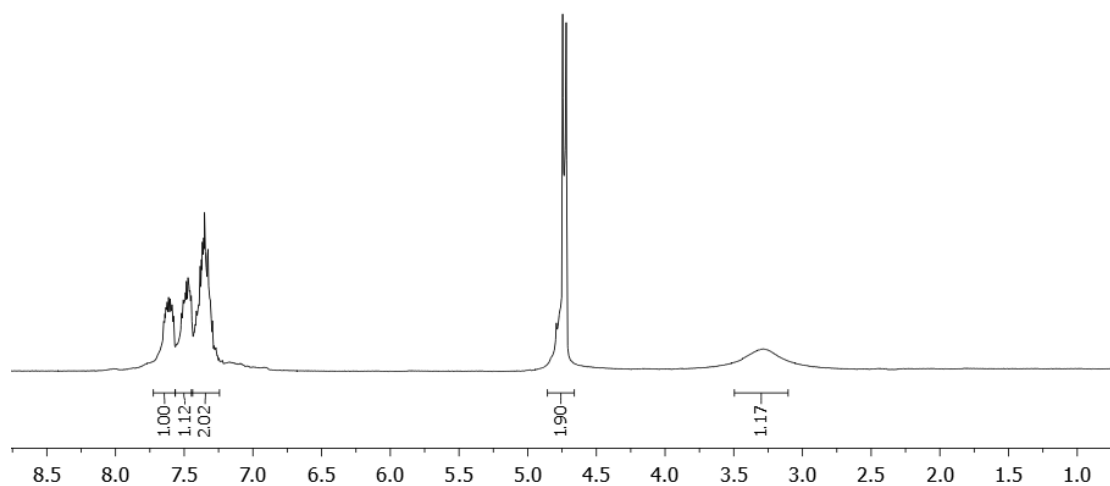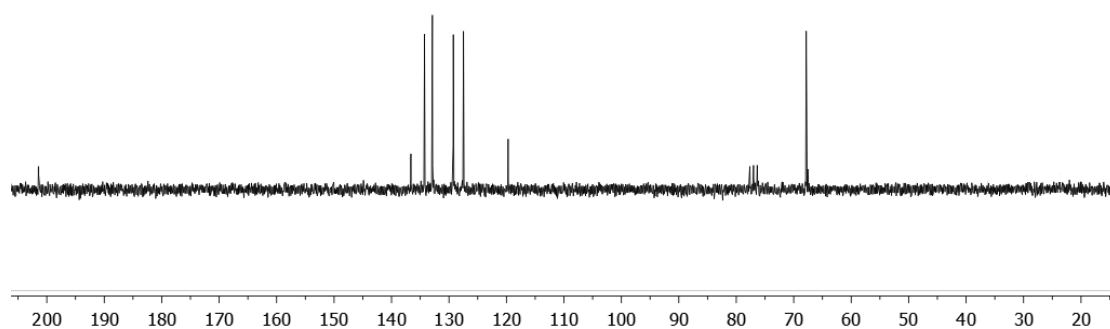



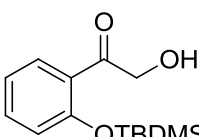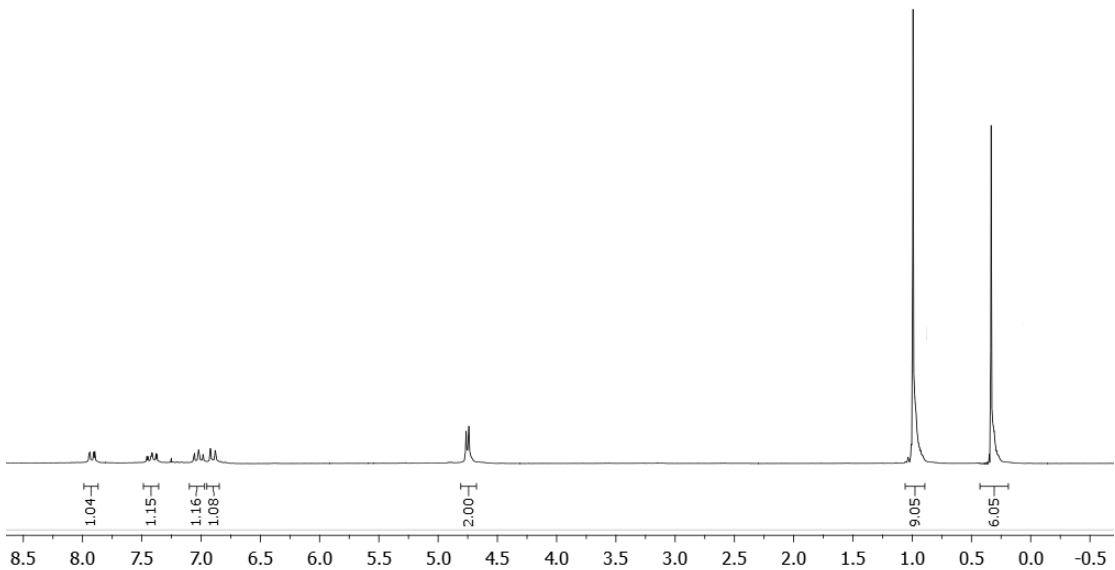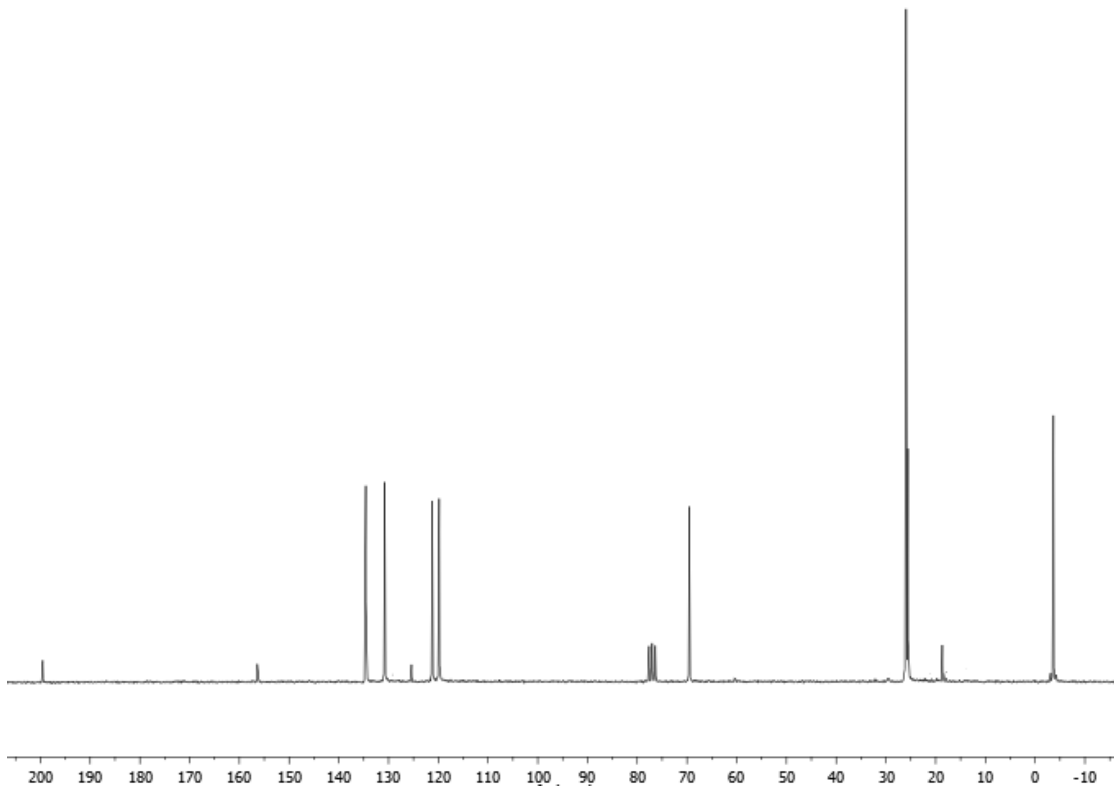

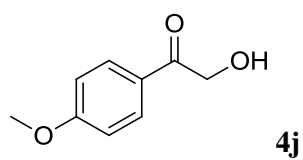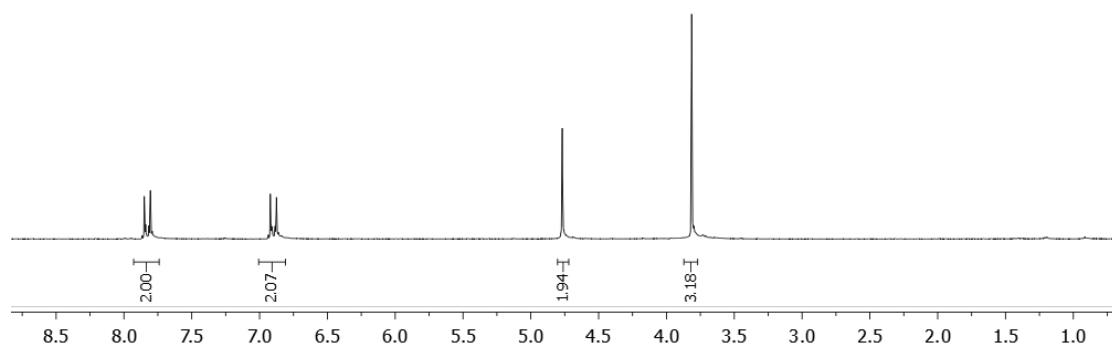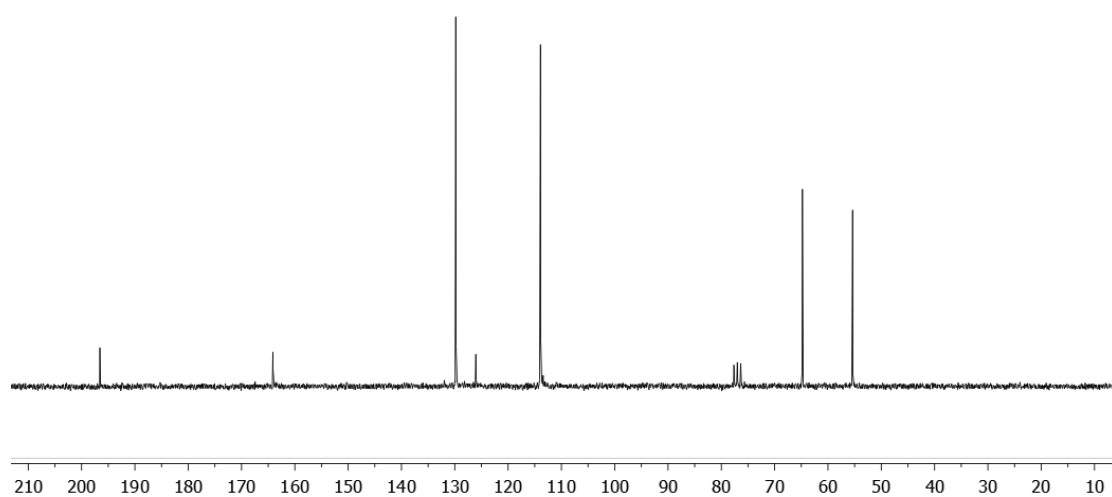

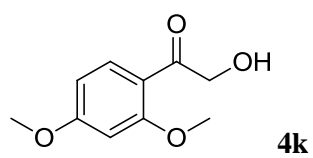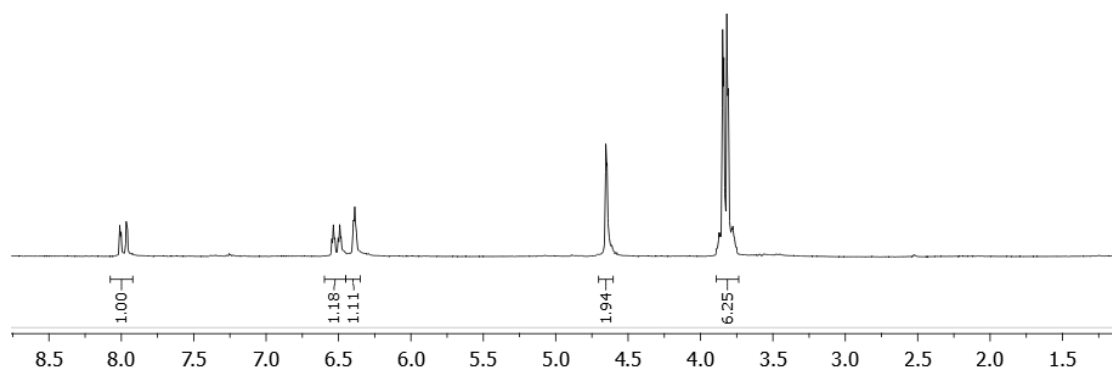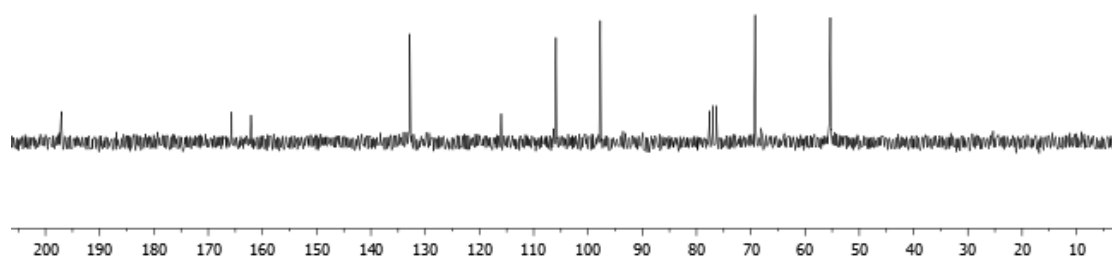

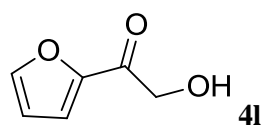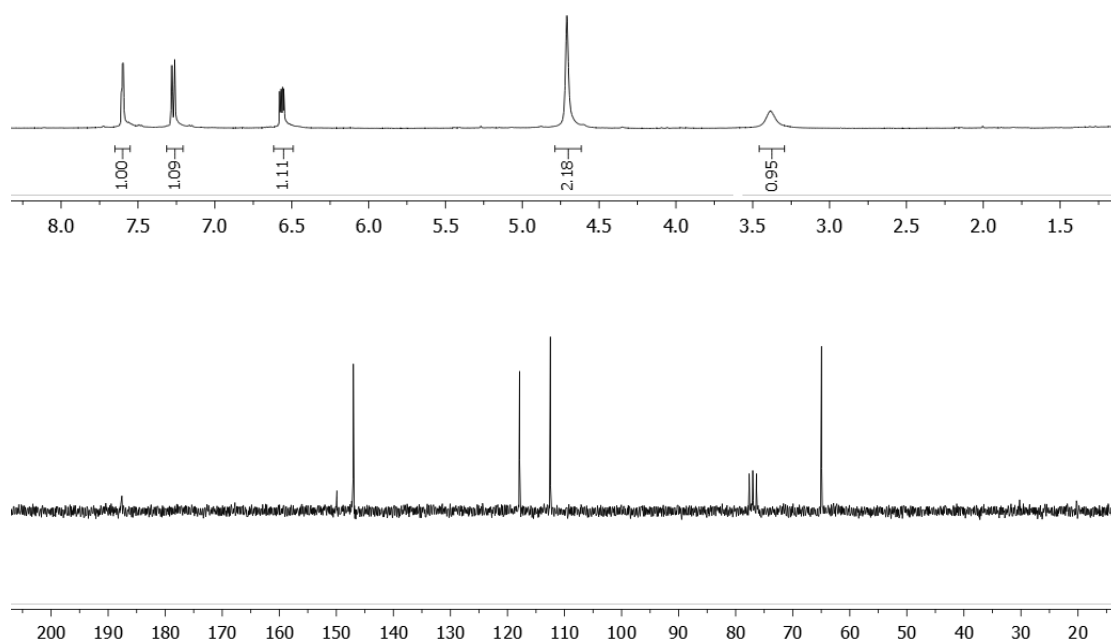

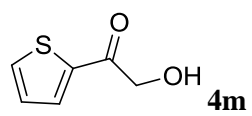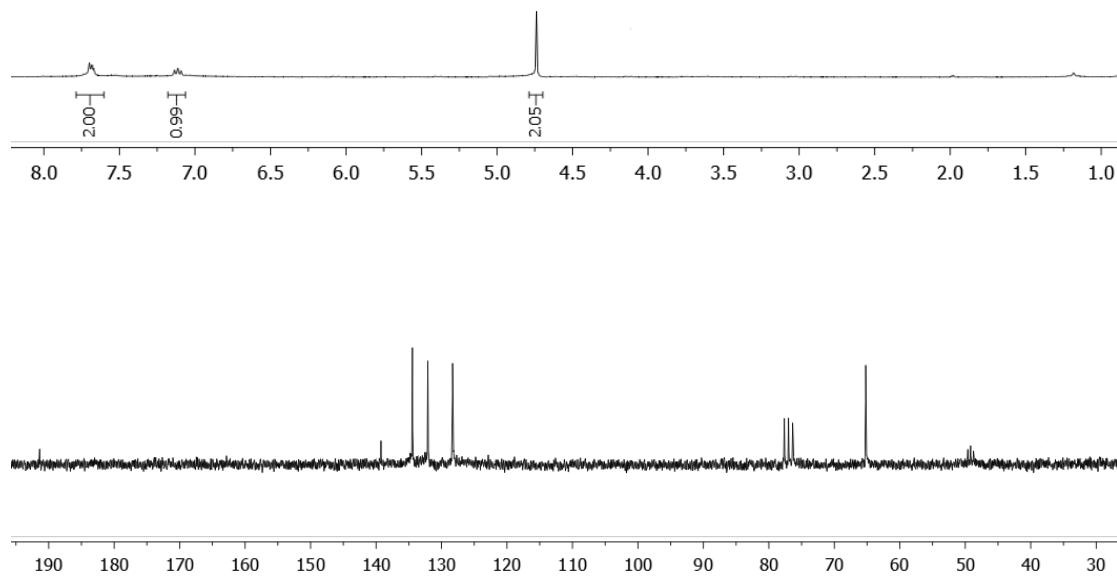

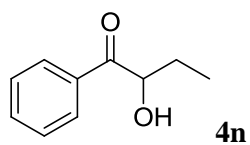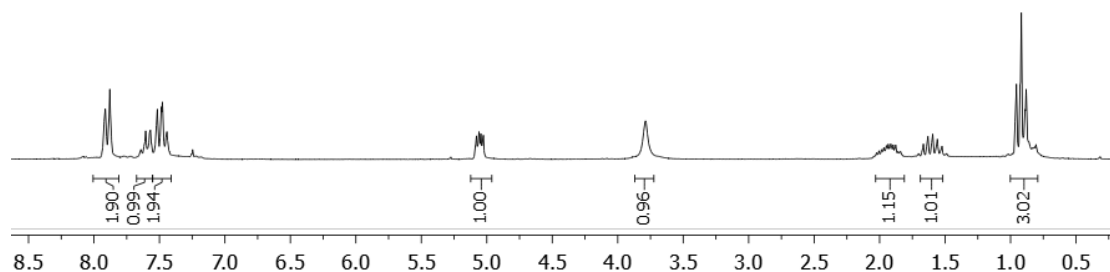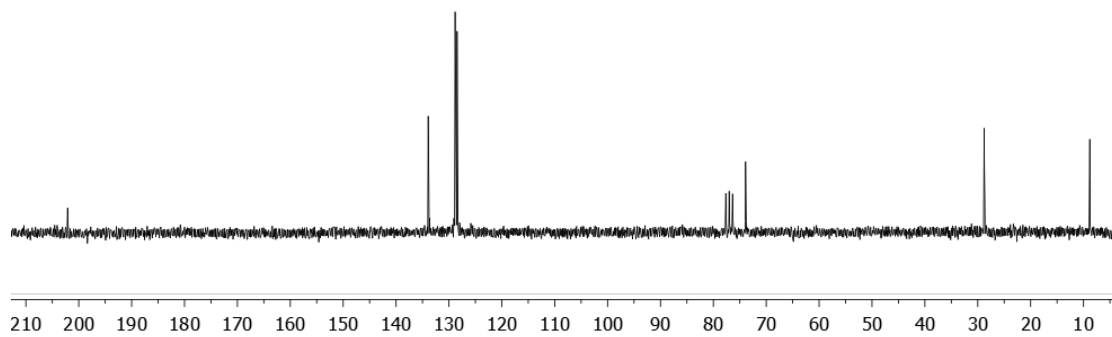

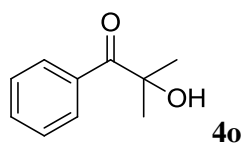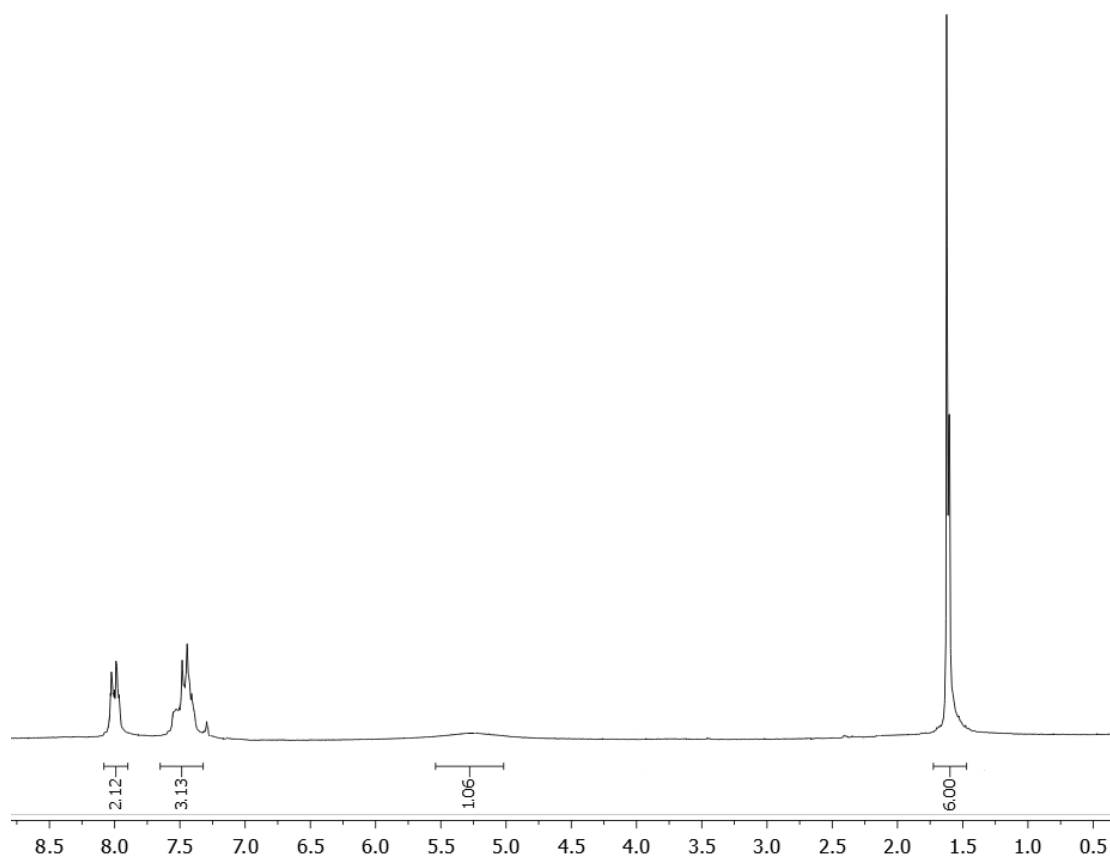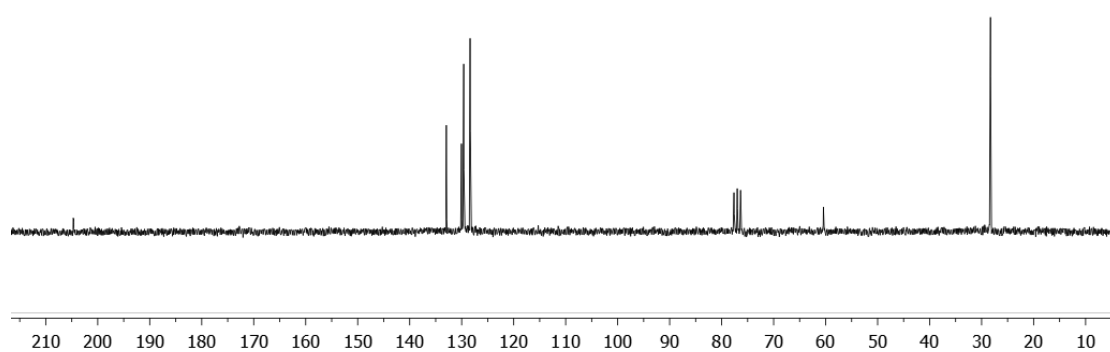

Supplement: c6ob00036c1.pdf [file c6ob00036c1.pdf]
